# Supplementary material for: Optimization and Testing of a Commercial Viability PCR Protocol to Detect Escherichia coli in Whole Blood
Source: MDPI journal article supplement (doi:10.3390/microorganisms12040765), 2024-04-10
Supplement: s1 [file s1]

Supplemental Table S1: Average Ct values from 5 biological replicates from which linear regression was calculated. "HK" represents heat killed and number in sample column is CFU/mL ( $10^x$  CFU/mL).

| Sample                      | Ct   | Sample                                    | Ct   |
|-----------------------------|------|-------------------------------------------|------|
| 10 <sup>8</sup> Live + 0 HK | 12.7 | 10 <sup>8</sup> Live + 10 <sup>7</sup> HK | 10.9 |
| 10 <sup>7</sup> Live + 0 HK | 15.5 | 10 <sup>7</sup> Live + 10 <sup>7</sup> HK | 13.7 |
| 10 <sup>6</sup> Live + 0 HK | 18.2 | 10 <sup>6</sup> Live + 10 <sup>7</sup> HK | 16.1 |
| 10 <sup>5</sup> Live + 0 HK | 21.0 | 10 <sup>5</sup> Live + 10 <sup>7</sup> HK | 19.2 |
| 10 <sup>4</sup> Live + 0 HK | 23.6 | 10 <sup>4</sup> Live + 10 <sup>7</sup> HK | 22.4 |
| 10 <sup>3</sup> Live + 0 HK | 26.4 | 10 <sup>3</sup> Live + 10 <sup>7</sup> HK | 24.8 |
| 10 <sup>2</sup> Live + 0 HK | 28.1 |                                           |      |

Supplemental Table S2: Summary of intra- and inter-assay variability for copy number and Cq values. Variability is represented as percent coefficient of variation (CV%) or standard deviation (SD). "HK" represents heat killed and number in sample column is CFU/mL ( $10^x$  CFU/mL).

| Sample                                    | Copy# CV%<br>intra | Copy# CV%<br>inter | Cq SD intra | Cq SD inter |
|-------------------------------------------|--------------------|--------------------|-------------|-------------|
| 10 <sup>8</sup> Live + 0 HK               | 5.7                | 4.6                | 0.06        | 1.64        |
| 10 <sup>7</sup> Live + 0 HK               | 3.6                | 4.7                | 0.01        | 1.63        |
| 10 <sup>6</sup> Live + 0 HK               | 6.8                | 6.0                | 0.05        | 1.84        |
| 10 <sup>5</sup> Live + 0 HK               | 7.9                | 6.0                | 0.18        | 1.72        |
| 10 <sup>4</sup> Live + 0 HK               | 7.4                | 4.9                | 0.10        | 1.25        |
| 10 <sup>3</sup> Live + 0 HK               | 8.8                | 7.4                | 0.04        | 2.03        |
| 10 <sup>2</sup> Live + 0 HK               | 10.0               | 10.1               | 0.23        | 2.44        |
| 10 <sup>8</sup> Live + 10 <sup>7</sup> HK | 3.1                | 1.3                | 0.06        | 0.47        |
| 10 <sup>7</sup> Live + 10 <sup>7</sup> HK | 7.2                | 3.9                | 0.17        | 1.37        |
| 10 <sup>6</sup> Live + 10 <sup>7</sup> HK | 6.6                | 1.5                | 0.10        | 0.48        |
| 10 <sup>5</sup> Live + 10 <sup>7</sup> HK | 5.9                | 2.0                | 0.09        | 0.60        |
| 10 <sup>4</sup> Live + 10 <sup>7</sup> HK | 12.7               | 3.6                | 0.12        | 0.94        |
| 10 <sup>3</sup> Live + 10 <sup>7</sup> HK | 15.4               | 6.9                | 0.17        | 1.71        |
| 10 <sup>2</sup> Live + 10 <sup>7</sup> HK | 16.2               | 9.5                | 0.24        | 2.20        |
